# Supplementary material for: Green tea polyphenol (epigallocatechin-3-gallate) improves gut dysbiosis and serum bile acids dysregulation in high-fat diet-fed mice
Source: PubMed Central journal article supplement (PMC6667385; doi:10.3164/jcbn.18-116), 2019-04-06
Supplement: jcbn18-116st01.pdf [file jcbn18-116st01.pdf]

**Supplemental Table 1.** Body weight and organ weight of mice

|                                                 | Control      | HFD           | HFD + EGCG                 |
|-------------------------------------------------|--------------|---------------|----------------------------|
| Initial body weight (g)                         | 20.85 ± 0.42 | 21.83 ± 0.27  | 20.82 ± 0.35               |
| Final body weight (g)                           | 26.76 ± 0.57 | 40.07 ± 1.37* | 37.24 ± 0.95* <sup>†</sup> |
| Body weight gain (g)                            | 5.91 ± 0.41  | 18.24 ± 1.17* | 16.42 ± 0.78*              |
| Food intake (g/day)                             | 2.30 ± 0.05  | 1.69 ± 0.07*  | 1.58 ± 0.05*               |
| Liver weight (g)                                | 1.39 ± 0.05  | 2.23 ± 0.17*  | 1.69 ± 0.09 <sup>†</sup>   |
| Liver/body weight ratio (%)                     | 5.22 ± 0.19  | 5.52 ± 0.27   | 4.54 ± 0.20 <sup>†</sup>   |
| Epididymal adipose tissue (g)                   | 0.44 ± 0.04  | 2.07 ± 0.13*  | 2.05 ± 0.08*               |
| Epididymal adipose tissue/body weight ratio (%) | 1.63 ± 0.12  | 5.14 ± 0.28*  | 5.50 ± 0.15*               |
| Content of cecum (g)                            | 0.57 ± 0.03  | 0.26 ± 0.01*  | 0.32 ± 0.05*               |
| Content of cecum/body weight ratio (%)          | 2.12 ± 0.09  | 0.66 ± 0.04*  | 0.85 ± 0.13*               |

C57BL/6N mice were fed with the control CE-2 diet (control), a high-fat diet (HFD), or the HFD supplemented with 0.32% EGCG (HFD + EGCG) for 8 weeks. Values are expressed as the means ± SEM (%) of eight mice in each group; \* $p < 0.05$  compared with the control group. <sup>†</sup> $p < 0.05$  compared with the HFD group.
