# Supplementary material for: Green tea polyphenol (epigallocatechin-3-gallate) improves gut dysbiosis and serum bile acids dysregulation in high-fat diet-fed mice
Source: PubMed Central journal article supplement (PMC6667385; doi:10.3164/jcbn.18-116), 2019-04-06
Supplement: jcbn18-116st02.pdf [file jcbn18-116st02.pdf]

**Supplemental Table 2.** Average abundance of phylum-level OTUs in C57BL/6N mice treated with control, HFD or HFD + EGCG

(%)

| Taxon<br>(Phylum level) | Control      | HFD           | HFD + EGCG                  |
|-------------------------|--------------|---------------|-----------------------------|
| Actinobacteria          | 0.39 ± 0.11  | 0.08 ± 0.05*  | 0.70 ± 0.21*. <sup>†</sup>  |
| Bacteroidetes           | 50.76 ± 6.34 | 37.58 ± 7.46* | 44.06 ± 2.10*               |
| Deferribacteres         | 0.67 ± 0.74  | 2.13 ± 1.71*  | 0.57 ± 0.69 <sup>†</sup>    |
| Firmicutes              | 43.61 ± 5.63 | 42.81 ± 4.65  | 26.55 ± 3.47*. <sup>†</sup> |
| Proteobacteria          | 3.38 ± 1.93  | 17.36 ± 3.90* | 10.23 ± 2.56*. <sup>†</sup> |
| TM7                     | 0.02 ± 0.07  | 0.00 ± 0.00   | 0.08 ± 0.17                 |
| Tenericutes             | 0.03 ± 0.07  | 0.00 ± 0.00   | 0.00 ± 0.00                 |
| Verrucumicrobia         | 1.10 ± 1.53  | 0.01 ± 0.04   | 17.76 ± 2.54*. <sup>†</sup> |
| Others                  | 0.00 ± 0.00  | 0.04 ± 0.05   | 0.05 ± 0.08                 |

C57BL/6N mice were fed with the control CE-2 diet (control), a high-fat diet (HFD), or the HFD supplemented with 0.32% EGCG (HFD + EGCG) for 8 weeks. Values are expressed as the means ± SEM (%) of eight mice in each group; \* $p < 0.05$  compared with the control group. <sup>†</sup> $p < 0.05$  compared with the HFD group.
