# Supplementary material for: Green tea polyphenol (epigallocatechin-3-gallate) improves gut dysbiosis and serum bile acids dysregulation in high-fat diet-fed mice
Source: PubMed Central journal article supplement (PMC6667385; doi:10.3164/jcbn.18-116), 2019-04-06
Supplement: jcbn18-116st03.pdf [file jcbn18-116st03.pdf]

**Supplemental Table 3.** Correlation between bile acid and gut microbiota in HFD-fed mice

| Taxon                                          | Free-       |                   |                   |                   |                       |                  |                  |                      |                 |                 |                      |                   |                     |                      |                       |                           | Glyco-                 |             |                       |                  |                  | Tauro-               |             |                   |                   |                   |                       |                  |                  |                      |       |
|------------------------------------------------|-------------|-------------------|-------------------|-------------------|-----------------------|------------------|------------------|----------------------|-----------------|-----------------|----------------------|-------------------|---------------------|----------------------|-----------------------|---------------------------|------------------------|-------------|-----------------------|------------------|------------------|----------------------|-------------|-------------------|-------------------|-------------------|-----------------------|------------------|------------------|----------------------|-------|
|                                                | Cholic acid | ω-Muricholic acid | α-Muricholic acid | β-Muricholic acid | Chenodeoxycholic acid | Deoxycholic acid | Lithocholic acid | Ursodeoxycholic acid | Ursocholic acid | Hyochoolic acid | Murideoxycholic acid | Hydoxycholic acid | Isodeoxycholic acid | 3-Dehydrocholic acid | 7-Oxodeoxycholic acid | 3-Dehydrodeoxycholic acid | 12-Oxolithocholic acid | Cholic acid | Chenodeoxycholic acid | Deoxycholic acid | Lithocholic acid | Ursodeoxycholic acid | Cholic acid | ω-Muricholic acid | α-Muricholic acid | β-Muricholic acid | Chenodeoxycholic acid | Deoxycholic acid | Lithocholic acid | Ursodeoxycholic acid |       |
| <i>g__Adlercreutzia</i>                        | 0.67*       | 0.55              | -0.03             | -0.03             | 0.18                  | -0.17            | 0.38             | -0.26                | 0.07            | 0.35            | 0.37                 | -0.18             | -0.35               | 0.49                 | -0.03                 | 0.42                      | 0.00                   | -0.21       | 0.28                  | 0.52             | 0.53             | 0.42                 | -0.84*      | 0.45              | -0.38             | -0.79*            | 0.44                  | -0.54            | 0.55             | 0.30                 |       |
| <i>o__Bacteroidales; f__Unclassified</i>       | -0.15       | -0.43             | -0.38             | -0.46             | -0.21                 | 0.25             | 0.40             | 0.62*                | 0.45            | -0.18           | -0.15                | 0.71*             | 0.81*               | -0.20                | 0.51                  | -0.15                     | 0.62*                  | 0.54        | 0.15                  | -0.29            | -0.24            | -0.28                | 0.32        | -0.07             | 0.53              | 0.46              | -0.13                 | 0.05             | -0.19            | 0.15                 |       |
| <i>g__Bacteroides</i>                          | 0.13        | 0.26              | 0.45              | -0.05             | 0.38                  | -0.09            | -0.08            | -0.64*               | -0.26           | 0.20            | 0.47                 | -0.55             | -0.53               | 0.25                 | -0.51                 | -0.13                     | -0.33                  | -0.03       | -0.10                 | 0.30             | 0.26             | 0.25                 | -0.25       | -0.10             | -0.31             | -0.54             | 0.13                  | 0.32             | 0.14             | 0.07                 |       |
| <i>g__Parabacteroides</i>                      | 0.63*       | 0.50              | 0.07              | 0.35              | 0.15                  | -0.47            | 0.46             | 0.25                 | 0.36            | 0.29            | 0.23                 | 0.32              | 0.09                | 0.38                 | -0.15                 | 0.42                      | 0.48                   | -0.37       | 0.20                  | 0.49             | 0.38             | 0.59*                | -0.72*      | 0.45              | -0.29             | -0.47             | 0.27                  | -0.63*           | -0.03            | -0.03                |       |
| <i>f__Rikenellaceae; g__Unclassified</i>       | -0.21       | -0.68*            | -0.32             | -0.29             | -0.10                 | 0.39             | 0.05             | 0.39                 | 0.26            | -0.27           | -0.11                | 0.43              | 0.47                | -0.31                | 0.57                  | -0.27                     | 0.32                   | 0.59*       | -0.10                 | -0.39            | -0.37            | -0.31                | 0.45        | 0.08              | 0.41              | 0.65*             | -0.12                 | 0.31             | -0.28            | 0.18                 |       |
| <i>f__S24-7; g__Unclassified</i>               | -0.04       | -0.69*            | -0.59*            | -0.28             | -0.06                 | 0.47             | 0.01             | 0.40                 | 0.29            | -0.26           | -0.10                | 0.66*             | 0.53                | -0.28                | 0.58*                 | 0.00                      | 0.25                   | 0.20        | 0.01                  | -0.27            | -0.27            | -0.19                | 0.37        | 0.24              | 0.35              | 0.40              | 0.02                  | -0.01            | -0.10            | 0.33                 |       |
| <i>g__[Prevotella]</i>                         | 0.38        | 0.78*             | 0.08              | 0.16              | -0.20                 | -0.66*           | 0.58*            | 0.24                 | 0.20            | 0.15            | -0.24                | -0.08             | 0.22                | 0.25                 | 0.20                  | 0.10                      | 0.36                   | 0.25        | 0.24                  | 0.00             | 0.12             | -0.10                | -0.55       | 0.07              | -0.05             | -0.27             | -0.13                 | -0.66*           | 0.40             | -0.20                |       |
| <i>g__Mucispirillum</i>                        | -0.30       | -0.50             | 0.03              | -0.58*            | -0.05                 | 0.48             | -0.05            | 0.13                 | -0.10           | -0.21           | 0.08                 | 0.15              | 0.15                | -0.31                | 0.13                  | -0.31                     | 0.16                   | 0.17        | 0.06                  | -0.32            | -0.25            | -0.34                | 0.36        | -0.17             | 0.57              | 0.37              | -0.16                 | 0.69*            | -0.14            | 0.40                 |       |
| <i>g__Lactobacillus</i>                        | -0.33       | -0.26             | -0.45             | 0.05              | -0.31                 | 0.22             | -0.34            | 0.07                 | -0.01           | -0.13           | -0.54                | -0.12             | 0.02                | -0.15                | 0.62*                 | 0.06                      | -0.34                  | 0.35        | -0.23                 | -0.39            | -0.37            | -0.45                | 0.40        | 0.02              | -0.03             | 0.51              | -0.06                 | -0.10            | 0.03             | -0.05                |       |
| <i>g__Lactococcus</i>                          | -0.44       | -0.15             | -0.27             | 0.28              | -0.27                 | 0.08             | -0.50            | 0.03                 | -0.11           | -0.09           | -0.53                | -0.10             | -0.05               | -0.15                | 0.18                  | 0.14                      | -0.41                  | -0.09       | -0.27                 | -0.25            | -0.30            | -0.25                | 0.45        | -0.16             | -0.14             | 0.42              | -0.09                 | -0.10            | -0.18            | -0.28                |       |
| <i>o__Clostridiales; g__Unclassified</i>       | -0.10       | -0.83*            | -0.52             | -0.51             | 0.06                  | 0.67*            | -0.09            | 0.08                 | -0.04           | -0.22           | -0.16                | 0.26              | 0.17                | -0.30                | 0.51                  | -0.05                     | -0.12                  | 0.07        | 0.36                  | -0.21            | 0.05             | -0.31                | 0.47        | 0.12              | 0.66*             | 0.34              | 0.00                  | 0.35             | 0.16             | 0.20                 |       |
| <i>f__Lachnospiraceae; g__Unclassified</i>     | -0.79*      | -0.38             | -0.10             | 0.14              | -0.32                 | 0.17             | -0.60*           | 0.16                 | -0.17           | -0.37           | -0.48                | -0.06             | 0.14                | -0.46                | 0.18                  | -0.31                     | -0.30                  | 0.26        | -0.54                 | -0.55            | -0.65*           | -0.47                | 0.82*       | -0.47             | 0.07              | 0.77*             | -0.31                 | 0.36             | -0.45            | -0.28                |       |
| <i>f__Lachnospiraceae; g__Clostridium</i>      | -0.51       | -0.34             | 0.29              | -0.12             | -0.29                 | 0.50             | -0.45            | -0.28                | -0.34           | -0.11           | 0.20                 | -0.13             | -0.27               | -0.25                | -0.50                 | -0.26                     | -0.24                  | -0.15       | -0.21                 | -0.24            | -0.31            | -0.18                | 0.39        | -0.31             | -0.13             | 0.32              | -0.20                 | 0.48             | -0.17            | 0.26                 |       |
| <i>g__[Ruminococcus]</i>                       | -0.53       | -0.77*            | -0.59*            | -0.27             | -0.02                 | 0.59*            | -0.20            | 0.32                 | 0.22            | -0.25           | -0.10                | 0.60*             | 0.44                | -0.30                | 0.25                  | 0.01                      | -0.04                  | 0.11        | -0.12                 | 0.01             | -0.09            | 0.05                 | 0.73*       | -0.26             | 0.25              | 0.43              | 0.21                  | 0.23             | -0.45            | -0.12                |       |
| <i>f__Ruminococcaceae; g__Unclassified</i>     | 0.27        | 0.73*             | 0.60*             | 0.78*             | -0.22                 | -0.63*           | 0.02             | -0.08                | -0.02           | 0.18            | 0.14                 | -0.30             | -0.31               | 0.22                 | -0.45                 | 0.01                      | 0.16                   | -0.11       | -0.33                 | 0.02             | -0.17            | 0.22                 | -0.58*      | 0.21              | -0.77*            | -0.12             | -0.15                 | -0.50            | -0.07            | -0.11                |       |
| <i>g__Anaerotruncus</i>                        | -0.85*      | -0.13             | 0.13              | -0.08             | -0.25                 | 0.06             | -0.54            | -0.02                | -0.30           | -0.31           | -0.38                | -0.21             | 0.13                | -0.40                | -0.12                 | -0.41                     | -0.33                  | 0.21        | -0.49                 | -0.55            | -0.63*           | -0.55                | 0.78*       | -0.76*            | 0.15              | 0.50              | -0.43                 | 0.78*            | 0.54             | -0.33                | -0.20 |
| <i>g__Oscillospira</i>                         | -0.42       | -0.68*            | -0.29             | -0.76*            | 0.08                  | 0.64*            | -0.02            | 0.03                 | 0.00            | -0.17           | 0.02                 | 0.21              | 0.26                | -0.24                | 0.24                  | -0.24                     | -0.04                  | 0.34        | 0.15                  | -0.13            | -0.02            | -0.26                | 0.59*       | -0.33             | 0.61*             | 0.27              | 0.03                  | 0.68*            | -0.09            | 0.17                 |       |
| <i>g__Allobaculum</i>                          | 0.95*       | 0.30              | 0.02              | 0.20              | 0.42                  | -0.37            | 0.26             | -0.40                | 0.23            | 0.55            | 0.05                 | -0.15             | -0.21               | 0.61*                | 0.05                  | 0.49                      | 0.03                   | -0.27       | 0.38                  | 0.24             | 0.37             | 0.18                 | -0.70*      | 0.78*             | -0.26             | -0.61*            | 0.04                  | -0.51            | 0.45             | 0.26                 |       |
| <i>f__Erysipelotrichaceae; g__Clostridium</i>  | 0.38        | 0.86*             | 0.63*             | 0.73*             | -0.17                 | -0.87*           | 0.22             | 0.10                 | -0.02           | 0.14            | -0.04                | -0.26             | -0.13               | 0.17                 | -0.37                 | -0.03                     | 0.32                   | -0.18       | -0.08                 | -0.03            | -0.07            | 0.11                 | -0.63*      | 0.15              | -0.40             | -0.16             | -0.31                 | -0.52            | 0.03             | -0.27                |       |
| <i>g__Sutterella</i>                           | 0.09        | 0.98*             | 0.51              | 0.48              | -0.31                 | -0.75*           | 0.14             | 0.06                 | -0.15           | 0.07            | -0.14                | -0.39             | -0.14               | 0.12                 | -0.29                 | -0.04                     | 0.11                   | -0.07       | -0.17                 | -0.08            | -0.14            | -0.05                | -0.49       | -0.17             | -0.38             | -0.21             | -0.24                 | -0.46            | 0.16             | -0.23                |       |
| <i>f__Desulfovibrionaceae; g__Unclassified</i> | -0.78*      | -0.52             | -0.31             | -0.09             | -0.24                 | 0.36             | -0.53            | 0.21                 | -0.12           | -0.35           | -0.43                | 0.18              | 0.26                | -0.45                | 0.16                  | -0.16                     | -0.28                  | 0.05        | -0.32                 | -0.38            | -0.45            | -0.36                | 0.87*       | -0.50             | 0.25              | 0.62*             | -0.16                 | 0.37             | -0.40            | -0.21                |       |
| <i>g__Akkermansia</i>                          | 0.78*       | 0.66*             | 0.23              | 0.30              | 0.17                  | -0.49            | 0.51             | -0.08                | 0.15            | 0.36            | 0.30                 | -0.10             | -0.25               | 0.47                 | -0.18                 | 0.33                      | 0.27                   | -0.27       | 0.33                  | 0.49             | 0.52             | 0.49                 | -0.92*      | 0.51              | -0.35             | -0.65*            | 0.24                  | -0.62*           | 0.36             | 0.02                 |       |
| Others                                         | -0.10       | 0.85*             | 0.29              | 0.40              | -0.35                 | -0.61*           | 0.12             | 0.19                 | -0.03           | 0.09            | -0.24                | -0.28             | -0.07               | 0.14                 | -0.13                 | 0.08                      | 0.09                   | 0.02        | -0.19                 | 0.03             | -0.08            | 0.02                 | -0.33       | -0.25             | -0.35             | -0.08             | -0.05                 | -0.43            | -0.02            | -0.35                |       |

JMP statistical software was used to calculate Pearson's correlation coefficient (*r*). C57BL/6N mice were fed with a high-fat diet (HFD), or the HFD supplemented with 0.32% EGCG (HFD + EGCG) for 8 weeks. Values are expressed six mice in each group; \**p*<0.05.
