# Supplementary material for: Green tea polyphenol (epigallocatechin-3-gallate) improves gut dysbiosis and serum bile acids dysregulation in high-fat diet-fed mice
Source: PubMed Central journal article supplement (PMC6667385; doi:10.3164/jcbn.18-116), 2019-04-06
Supplement: jcbn18-116st04.pdf [file jcbn18-116st04.pdf]

**Supplemental Table 4.** Correlation between indices of deconjugation or 7 $\alpha$ -dehydroxylation in serum and gut microbiota in HFD-fed mice

| Taxon                                          | Deconjugation          |                                                        |                           | 7 $\alpha$ -Dehydroxylation |                      |
|------------------------------------------------|------------------------|--------------------------------------------------------|---------------------------|-----------------------------|----------------------|
|                                                | CA/<br>(CA + Tauro-CA) | $\beta$ -MCA/<br>( $\beta$ -MCA + Tauro- $\beta$ -MCA) | DCA/<br>(DCA + Tauro-DCA) | DCA/<br>(DCA + CA)          | LCA/<br>(LCA + CDCA) |
| <i>g__Adlercreutzia</i>                        | 0.81*                  | 0.88*                                                  | 0.51                      | -0.52                       | -0.29                |
| <i>o__Bacteroidales; f__Unclassified</i>       | -0.36                  | -0.71*                                                 | 0.00                      | 0.19                        | 0.68*                |
| <i>g__Bacteroides</i>                          | 0.37                   | 0.37                                                   | -0.35                     | -0.10                       | -0.32                |
| <i>g__Parabacteroides</i>                      | 0.73*                  | 0.63*                                                  | 0.62*                     | -0.74*                      | -0.16                |
| <i>f__Rikenellaceae; g__Unclassified</i>       | -0.43                  | -0.79*                                                 | -0.14                     | 0.26                        | 0.69*                |
| <i>f__S24-7; g__Unclassified</i>               | -0.35                  | -0.51                                                  | 0.21                      | 0.17                        | 0.46                 |
| <i>g__[Prevotella]</i>                         | 0.48                   | 0.41                                                   | 0.45                      | -0.52                       | -0.04                |
| <i>g__Mucispirillum</i>                        | -0.37                  | -0.80*                                                 | -0.62*                    | 0.41                        | 0.45                 |
| <i>g__Lactobacillus</i>                        | -0.51                  | -0.21                                                  | 0.11                      | 0.40                        | 0.06                 |
| <i>g__Lactococcus</i>                          | -0.56                  | -0.07                                                  | 0.05                      | 0.40                        | -0.24                |
| <i>o__Clostridiales; g__Unclassified</i>       | -0.39                  | -0.62*                                                 | -0.12                     | 0.37                        | 0.51                 |
| <i>f__Lachnospiraceae; g__Unclassified</i>     | -0.88*                 | -0.62*                                                 | -0.41                     | 0.66*                       | 0.03                 |
| <i>f__Lachnospiraceae; g__Clostridium</i>      | -0.54                  | -0.29                                                  | -0.49                     | 0.57                        | -0.04                |
| <i>g__[Ruminococcus]</i>                       | -0.72*                 | -0.53                                                  | -0.11                     | 0.63*                       | 0.27                 |
| <i>f__Ruminococcaceae; g__Unclassified</i>     | 0.45                   | 0.66*                                                  | 0.37                      | -0.55                       | -0.37                |
| <i>g__Anaerotruncus</i>                        | -0.83*                 | -0.61*                                                 | -0.72*                    | 0.71*                       | -0.15                |
| <i>g__Oscillospira</i>                         | -0.54                  | -0.77*                                                 | -0.59*                    | 0.63*                       | 0.46                 |
| <i>g__Allobaculum</i>                          | 0.82*                  | 0.70*                                                  | 0.62*                     | -0.86*                      | -0.26                |
| <i>f__Erysipelotrichaceae; g__Clostridium</i>  | 0.57                   | 0.53                                                   | 0.35                      | -0.72*                      | -0.28                |
| <i>g__Sutterella</i>                           | 0.35                   | 0.50                                                   | 0.15                      | -0.37                       | -0.42                |
| <i>f__Desulfovibrionaceae; g__Unclassified</i> | -0.91*                 | -0.64*                                                 | -0.39                     | 0.76*                       | 0.03                 |
| <i>g__Akkermansia</i>                          | 0.94*                  | 0.84*                                                  | 0.60*                     | -0.82*                      | -0.19                |
| Others                                         | 0.16                   | 0.41                                                   | 0.12                      | -0.14                       | -0.36                |

JMP statistical software was used to calculate Pearson's correlation coefficient (*r*). C57BL/6N mice were fed with a high-fat diet (HFD), or the HFD supplemented with 0.32% EGCG (HFD + EGCG) for 8 weeks. Values are expressed six mice in each group; \**p*<0.05.
